# Supplementary material
Source: PubMed Central journal article supplement (PMC4297596)
Supplement: NIHMS614523-supplement-supplement_1.pdf [file NIHMS614523-supplement-supplement_1.pdf]

**SUPPLEMENTARY FIGURE LEGENDS**

- Figure 1. Comparison of effects of insulin and saline on blood glucose concentrations.** Blood glucose concentrations declined significantly during overnight saline and insulin infusions and were lower after insulin than saline (*left panel*). Observe inverse relationship between the change in fasting blood glucose concentration and gastric emptying  $t_{\text{half}}$  between first and second visits (*right panel*).
- Figure 2. Comparison of gastric emptying results in patients who received saline infusion between first and second studies.** Gastric emptying measurements deviated considerably from the line of equality (*left panel*). Differences between first (GE1) and second (GE2) gastric emptying values was not related to the average of these 2 studies, i.e. the Bland Altman Test was negative (*right panel*).

**Supplementary Table 1. Fasting and Postprandial Hormone Concentrations**

| Hormone                                                                                | Visit 1               |                        | Visit 2               |                        |
|----------------------------------------------------------------------------------------|-----------------------|------------------------|-----------------------|------------------------|
|                                                                                        | Fasting concentration | Postprandial increment | Fasting concentration | Postprandial increment |
| GLP-1 (pg/ml)                                                                          | 4.2 ± 0.9             | 5.4 ± 0.9 <sup>a</sup> | 4.9 ± 1.0             | 5.3 ± 1.3 <sup>a</sup> |
| IAPP (pM)                                                                              | 21.1 ± 3.8            | 4.8 ± 0.7 <sup>a</sup> | 15.9 ± 3.8            | 7.1 ± 1.0 <sup>a</sup> |
| C-peptide (pM)                                                                         | 1010 ± 100            | 110 ± 20 <sup>a</sup>  | 770 ± 90              | 200 ± 30 <sup>a</sup>  |
| Postprandial increment reflects difference (peak postprandial – fasting concentration) |                       |                        |                       |                        |
| <sup>a</sup> p < 0.0001 versus 0                                                       |                       |                        |                       |                        |

## Supplementary Figure 1

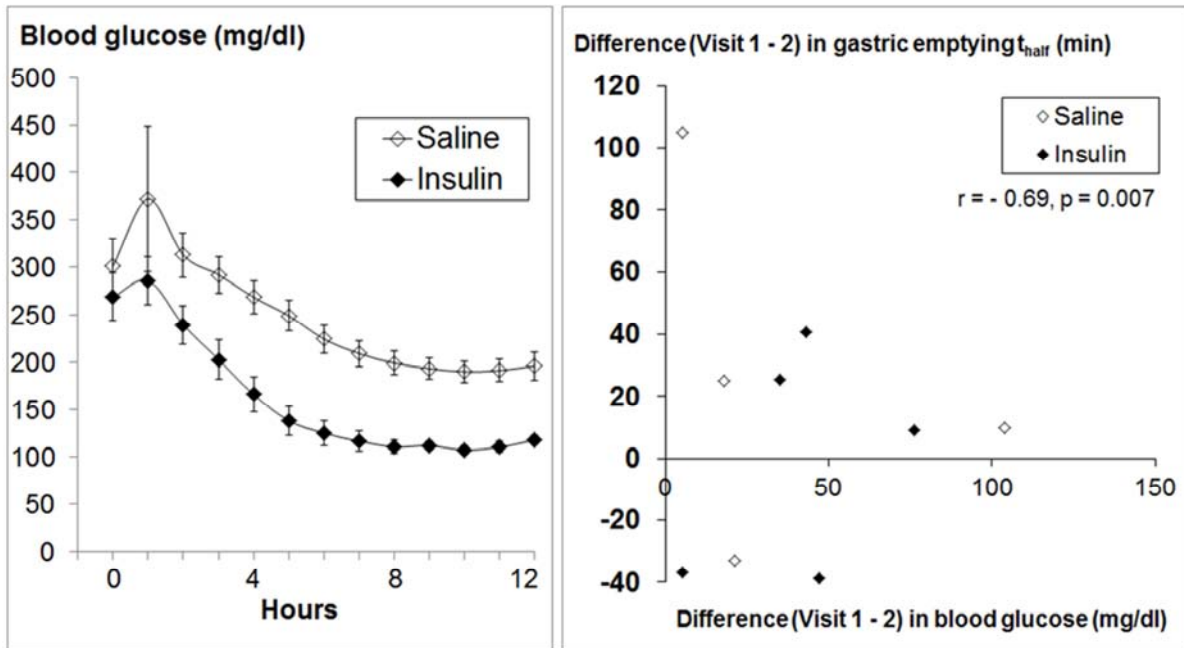

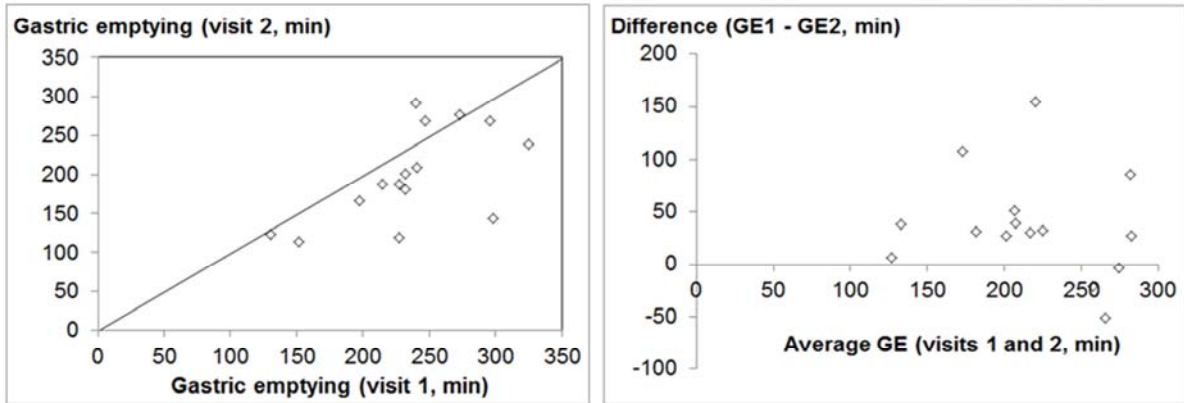

ACCEPTED MANUSCRIPT
